# Supplementary material
Source: Springer Nature journal article supplement (https://www.springermedizin.de/resource/supplementary/12876_2011_744_MOESM2_ESM.pdf/9437762)

Figure 2. The mean value of ferritin (mcg/L) in different locations of gastrointestinal tract cancers (colon = ascending, transverse and descending colon)

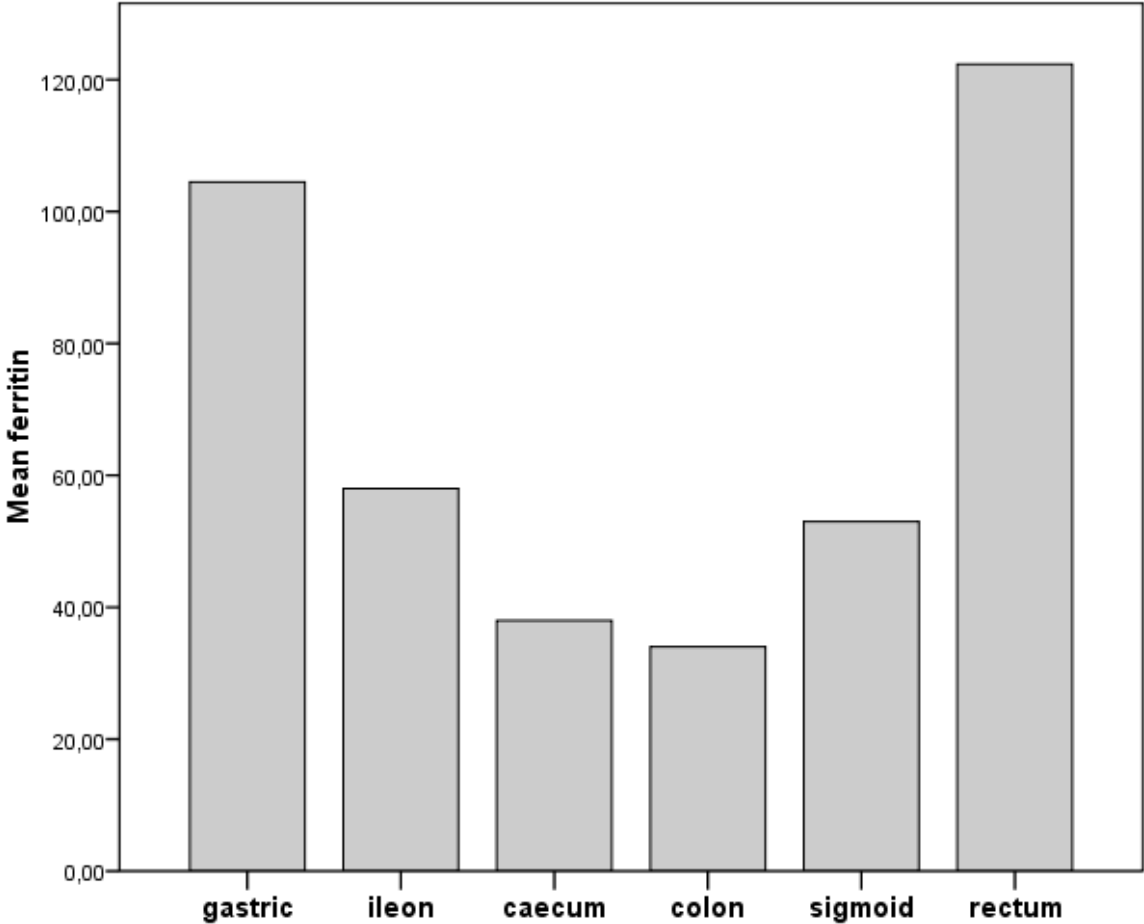

Supplement: MOESM2 [file 9437762]
